# Supplementary material for: Activation of phagocytic activity in astrocytes by reduced expression of the inflammasome component ASC and its implication in a mouse model of Alzheimer disease
Source: Springer Nature journal article supplement (doi:10.1186/s12974-016-0477-y), 2016-01-27
Supplement: MOESM1 [file 9769010]

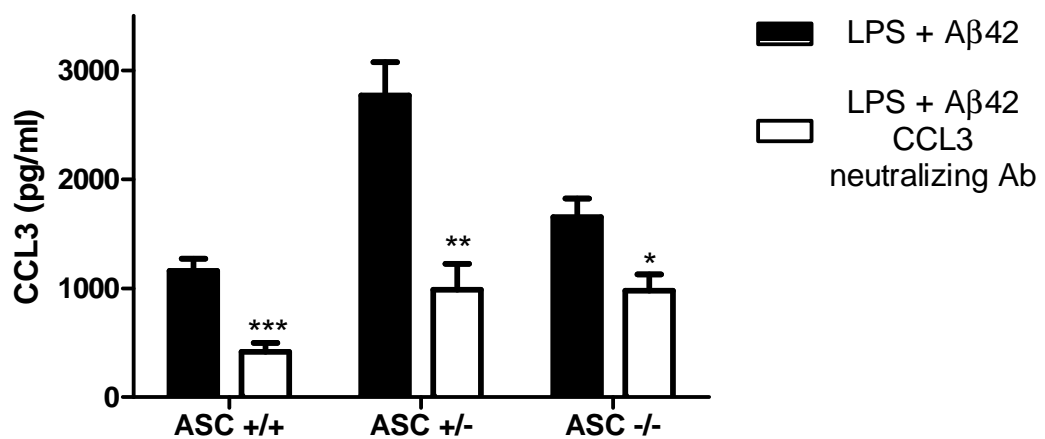

**Additional file 1: Neutralization of CCL3 by a specific antibody.** Astrocytes primed with 1μg/ml LPS for 3h were treated with 10μM Aβ42 for 3h. Specific antibody against CCL3 was added 45min after Aβ42. The concentration of CCL3 in culture supernatants were then measured by ECLIA. Results are the mean ± SEM derived from 3 experiments in duplicate and statistical differences were determined using a Mann Whitney test. \*\*\* $P < 0.001$ , \*\* $P < 0.01$  and \* $P < 0.05$  vs respective controls.
