# Supplementary material for: Activation of phagocytic activity in astrocytes by reduced expression of the inflammasome component ASC and its implication in a mouse model of Alzheimer disease
Source: Springer Nature journal article supplement (doi:10.1186/s12974-016-0477-y), 2016-01-27
Supplement: MOESM2 [file 9769010]

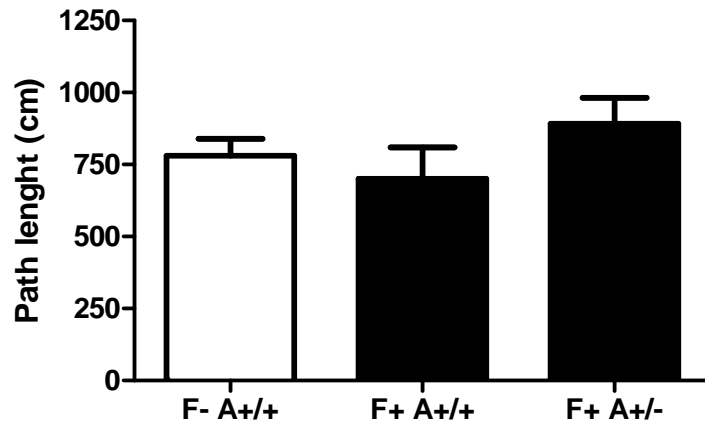

**Additional file 2:** Path length (cm) measured during the probe trial in the Morris Water Maze (MWM). Mice were let in the MWM for a 1min free swimming test. Total distances travelled were quantified and showed no difference between all tested groups (15 F-A<sup>+/+</sup>, 14 F+A<sup>+/+</sup> and 11 F+A<sup>+/-</sup>).
