# Supplementary material for: Activation of phagocytic activity in astrocytes by reduced expression of the inflammasome component ASC and its implication in a mouse model of Alzheimer disease
Source: Springer Nature journal article supplement (doi:10.1186/s12974-016-0477-y), 2016-01-27
Supplement: MOESM3 [file 9769010]

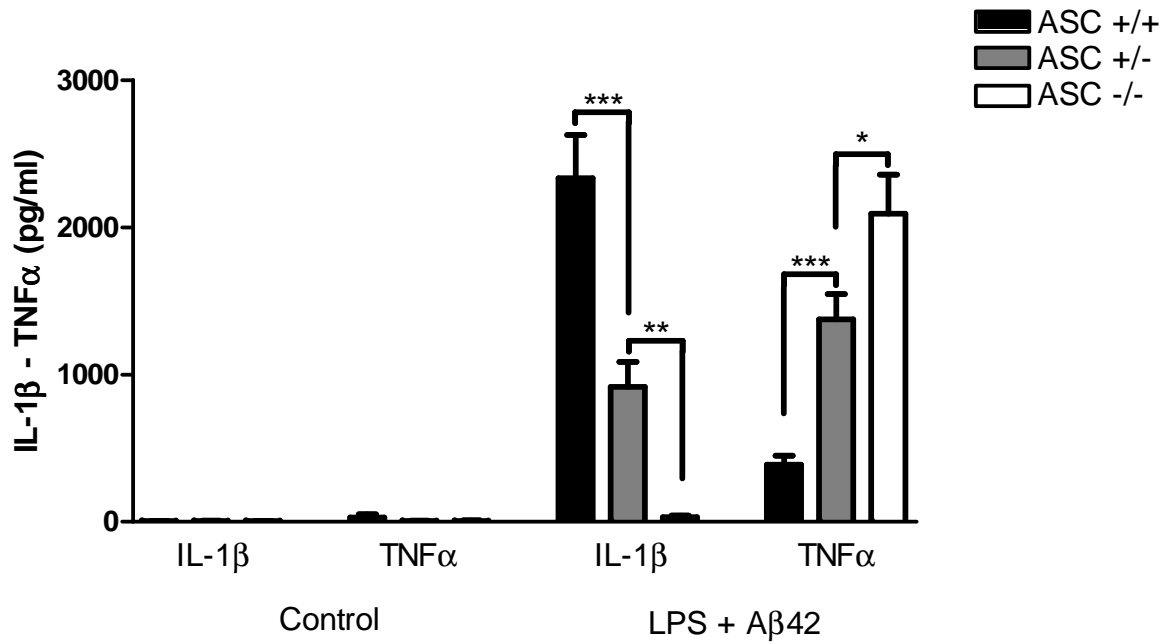

**Additional file 3: TNF $\alpha$  varies in inverse proportion to IL-1 $\beta$ .** Astrocytes primed with 1 $\mu$ g/ml LPS for 3h were treated with 10 $\mu$ M A $\beta$ 42 for 3h. The concentration of TNF $\alpha$  or IL-1 $\beta$  released in culture supernatants were then measured by specific ECLIA. Results are the mean  $\pm$  SEM and statistical differences were determined using an ANOVA analysis and post Bonferroni's Multiple Comparison Test (n=4 in duplicate). \*\*\* $P$ <0.001, \*\* $P$ <0.01 and \* $P$ <0.05 (n=4 in duplicate for all genotypes).
